# Supplementary material for: Collaborative Mental Health Care Versus Care as Usual in a Primary Care Setting: A Randomized Controlled Trial
Source: Atypon-hosted journal article supplement (doi:10.1176/ps.2009.60.1.74), 2009-01-01

Figure 1.

**Consort Diagram of participating general practitioner practices and number of patients referred to the trial**

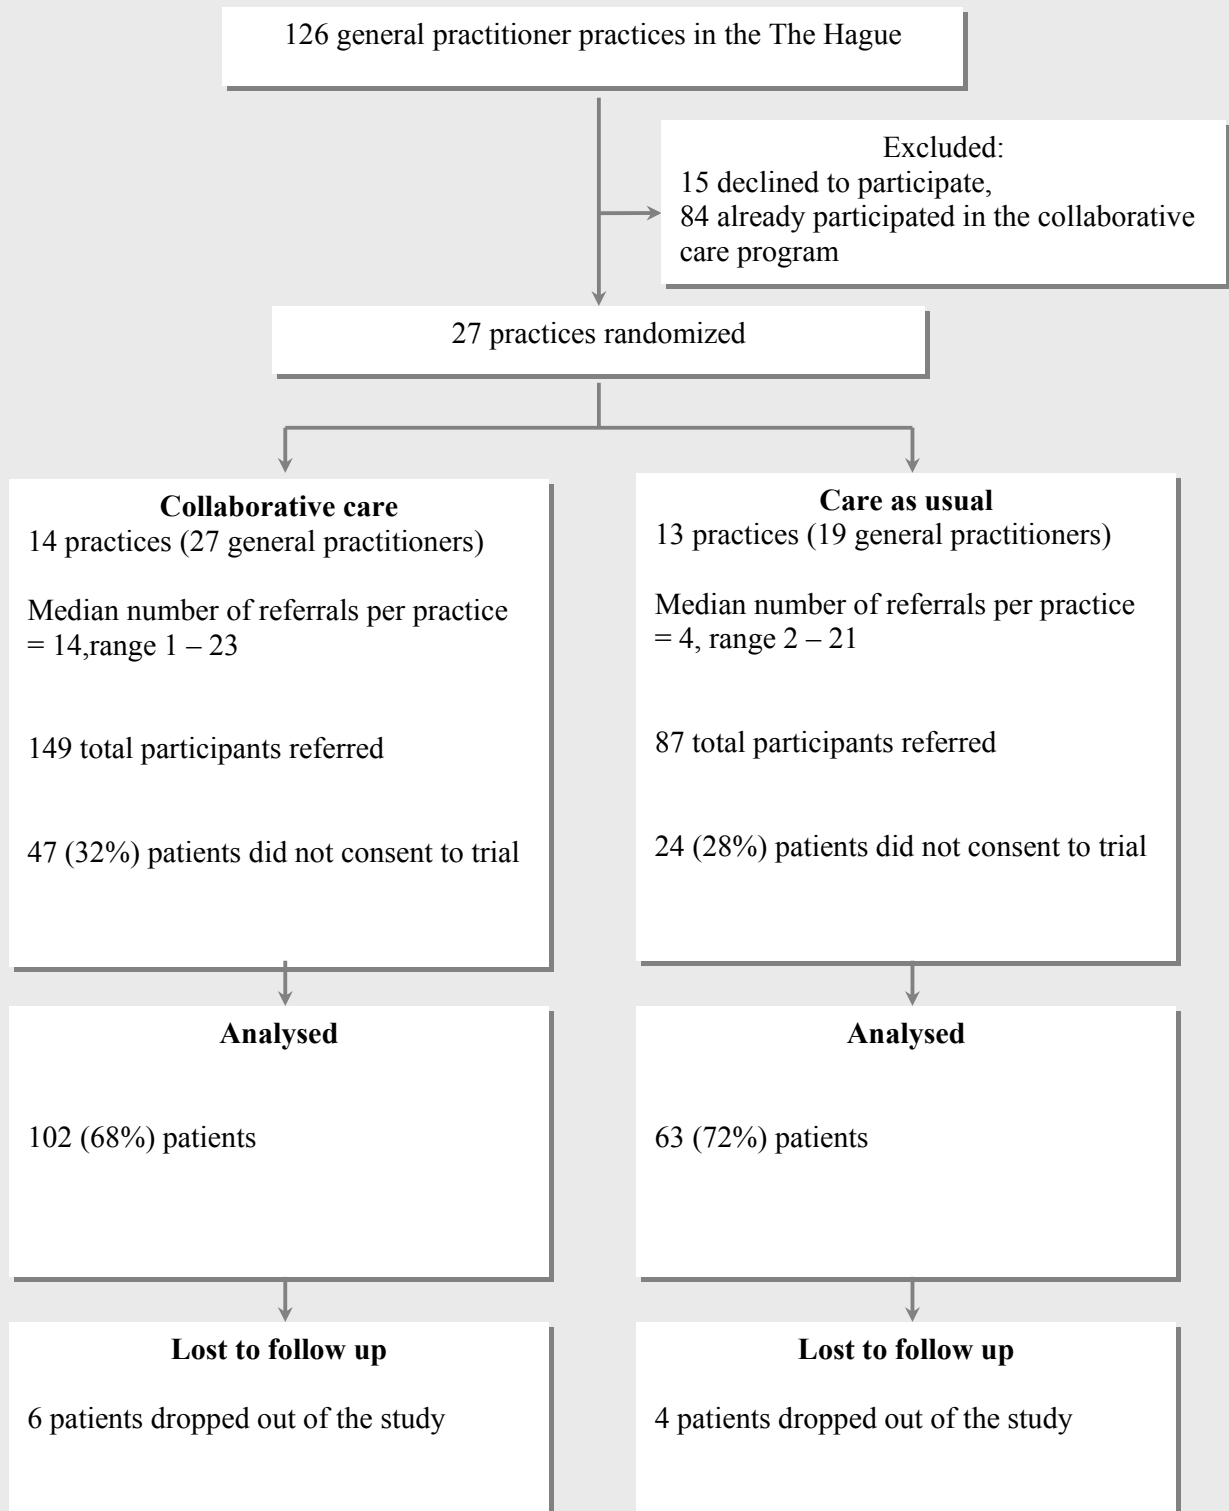

Supplement: pss_60_01_074_01.pdf [file pss_60_01_074_01.pdf]
